# Supplementary material
Source: PubMed Central journal article supplement (PMC6195481)
Supplement: NIHMS1503647-supplement-1.pdf [file NIHMS1503647-supplement-1.pdf]

**Supplementary Table 1. Primer pairs for qRT-PCR and ChIP assays. Related to Experimental Procedures.**

| <b>Gene Name</b>          | <b>Primer Sequence</b>                                                           |
|---------------------------|----------------------------------------------------------------------------------|
| <b>qRT-PCR primers</b>    |                                                                                  |
| <i>Il22</i>               | Forward 5'- ATGAGTTTTTCCCTTATGGGGAC -3'<br>Reverse 5'-GCTGGAAGTTGGACACCTCAA-3'   |
| <i>Il23a</i>              | Forward 5'- CGTATCCAGTGTGAAGATGGTT-3'<br>Reverse 5'- CTATCAGGGAGTAGAGCAGGCT-3'   |
| <i>Il12b</i>              | Forward 5'- GGAGACACCAGCAAAACGAT-3'<br>Reverse 5'- TCCAGATTCAGACTCCAGGG-3'       |
| <i>Il6</i>                | Forward 5'- CACAGAGGATACCACTCCCAACA-3'<br>Reverse 5'- TCCACGATTTCCAGAGAACA-3'    |
| <i>Il1b</i>               | Forward 5'-AAGCCTCGTGCTGTCCGACC-3'<br>Reverse 5'-TGAGGCCCAAGGCCACAGGT-3'         |
| <i>Tnf</i>                | Forward 5'- CATCTTCTCAA AATTCGAGTGACAA-3'<br>Reverse 5'- CCAGCTGCTCCTCCACTTG -3' |
| <i>Tgfb</i>               | Forward 5'- CCAGAGCCACATGCTCCTAGA-3'<br>Reverse 5'- CGCCCCGACGTTTGG -3'          |
| <i>Actin</i>              | Forward 5'- CGTGAAAAGATGACCCAGATCA-3'<br>Reverse 5'- CACAGCCTGGATGGCTACGT-3'     |
| <i>RegIIIb</i>            | Forward 5'- ATGGCTCCTATTGCTATGCC-3'<br>Reverse 5'- GATGTCCTGAGGGCCTCTT-3'        |
| <i>RegIIIg</i>            | Forward 5'- ATGGCTCCTATTGCTATGCC-3'<br>Reverse 5'- GATGTCCTGAGGGCCTCTT-3'        |
| <i>pIgR</i>               | Forward 5'- GCTCCAAAGTGCTGTTCTCC-3'<br>Reverse 5'- TTGCTGTGTGTCTGGAGAGG-3'       |
| <i>NIK</i>                | Forward 5'- CGCTTGTTTGAGGACAACGG-3'<br>Reverse 5'- TCTTCTCCACGGCCTCAAG-3'        |
| <b>ChIP assay primers</b> |                                                                                  |
| <i>Il23a</i> promoter     | Forward 5'- GCTCTCCAAAGAGGGAGATGA-3'<br>Reverse 5'- TCCTTTTGTCTCCAGTCTCT -3'     |
